# Supplementary material
Source: PubMed Central journal article supplement (PMC3370543)
Supplement: supp_78.12.4400_AEM07895-11_supplemental.pdf [file supp_78.12.4400_AEM07895-11_supplemental.pdf]

# **Functional specificity of extracellular nucleases in *Shewanella oneidensis* MR-1**

Magnus Heun, Lucas Binnenkade, Maximilian Kreienbaum, Kai M. Thormann\*

*Department of Ecophysiology, Max-Planck-Institut für terrestrische Mikrobiologie, Marburg, Germany*

\*Mailing address: MPI für terrestrische Mikrobiologie, Karl-von-Frisch-Strasse 10, 35043 Marburg, Germany, Tel +49 (0)6421 178302, Fax +49 (0)6421 178309, email: [thormann@mpi-marburg.mpg.de](mailto:thormann@mpi-marburg.mpg.de)

**-Supplemental Material-**

**Supplemental Table 1:** Primers used in this study

| Name                                              | Sequence (5' → 3')                                 |
|---------------------------------------------------|----------------------------------------------------|
| <b>In-frame deletion of <i>endA</i> (SO_0833)</b> |                                                    |
| MO11                                              | CGACTGCAGGCTGTAACCTCCATCGCTGG                      |
| MO12                                              | CGCCAACAATTAGCCGAATAAGGTCGACAATG                   |
| MO13                                              | TAATTGTTGGCGGTTCAACATTTATCCCAAAAATAATC             |
| MO14                                              | AGGATCCGCATTTGCAGCAAAATCGT                         |
| MO15                                              | CGCGCGTATGGGATAAAT                                 |
| MO16                                              | CCAACCACTCAATTTACCCTTAG                            |
| <b>In-frame deletion of <i>phoA</i> (SO_0831)</b> |                                                    |
| PstI_KO_phoA_US_fwd                               | ACGCTGCAGAGGGCGCTAACGGCTTAGCC                      |
| BamHI_KO_phoA_DS_rev                              | ACGGGATCCGGCATGGGTGGCACCTCG                        |
| OL_KO_phoA_US_rev                                 | GAGTATCACCCACAGGGCTAGTTTGCTGC                      |
| OL_KO_phoA_DS_fwd                                 | AGCCCTGTGGGTGATACTCATATCAGATCCC                    |
| Check_KO_phoA_fwd_2                               | GTTTTCCCCACCACAGTAATTGACCATTAG                     |
| Check_KO_phoA_rev_2                               | GCTTGTTTAGTGAATTTACCCCTGAGACC                      |
| <b>Construction of pMal-P2X-EndA</b>              |                                                    |
| MO50                                              | AGGATCCTCCCTTCGCATCCAAGC                           |
| MO51                                              | CGAGTCGACTCAATGATGATGATGATGATGTTCCGGCTAATTGTTGGCGC |
| <b>Overexpression of <i>endA</i></b>              |                                                    |
| PstI_endA_fw                                      | CACTGCAGAGGAGGAATTAACCATGTTGAACAACACCTCAATCG       |
| XhoI_endA_rev                                     | GTCACTCGAGTTATTCGGCTAATTGTTGGCGCAG                 |
| <b>qRT-PCR</b>                                    |                                                    |
| MO25                                              | GCAAGTATTGCTGTGCCTATTT                             |
| MO26                                              | AGACAAGACCTTGGCTTGACTAA                            |
| recA-Q-PCR-651-for                                | TCACATCAACCGCACCAGAACG                             |
| recA-Q-PCR-781-rev                                | CGCTCTTGATCCTATCTACGGC                             |
| qPCR_phoA_fw                                      | CTGGCAAGCTCTTCAAAGC                                |
| qPCR_phoA_rv                                      | GTGTTTTTAGGTGGTGGAC                                |
| <b>Operon mapping</b>                             |                                                    |
| MO29                                              | GCCTCATGATTTAGCACTAATACTTT                         |
| MO30                                              | GTCATACGGGTATGGATGTGC                              |
| MO31                                              | GCTTTGACTGGGTCACTCTCA                              |
| MO32                                              | CCAAAAAAGGCGAAACCC                                 |
| MO33                                              | CCATATAAAACAGTTGATAACCCCTT                         |
| MO34                                              | GCACTAAAACCTCAACTGCACC                             |
| MO35                                              | GCAAGATAATCATGACCATCGC                             |
| MO36                                              | GGTCATTGATTTAAGAATCGCC                             |
| MO37                                              | CTTGACTAAAACCTGCTTGGATGC                           |
| MO38                                              | CGTGAGTGGCAATCGATTATG                              |
| MO39                                              | GGATGTTCACTGTATTGGTATTG                            |
| MO40                                              | CCAGTGAAAAGTCAATGATAACC                            |

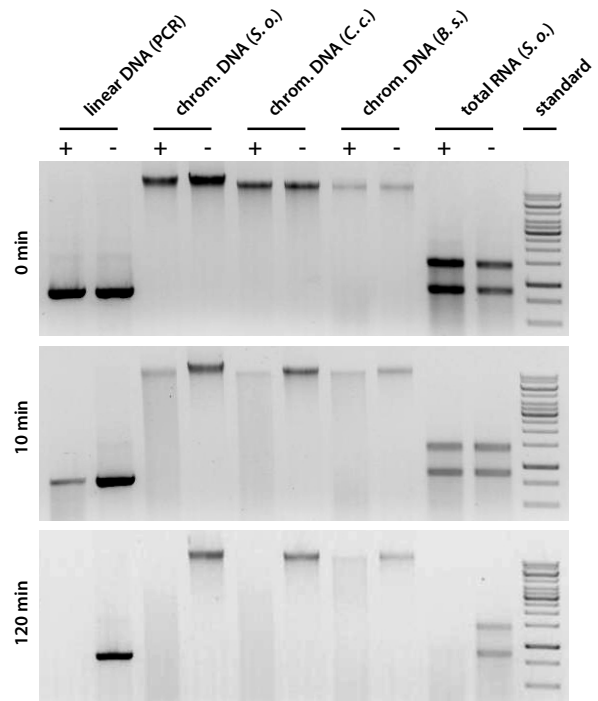

**Figure S1: Degradation of different nucleic acids by MBP-EndA.** 0.09 U of MBP-EndA (+) or the equimolar amount of MBP (-) that was purified in parallel were added to the indicated type of nucleic acid and incubated at 30 °C for the indicated amount of time prior to separation on a 1.0 % agarose gel. The chromosomal DNA was prepared from *Shewanella oneidensis* MR-1 (*S.o.*), *Caulobacter crescentus* (*C.c.*), and *Bacillus subtilis* (*B.s.*), the total RNA was prepared from *Shewanella oneidensis* MR-1.

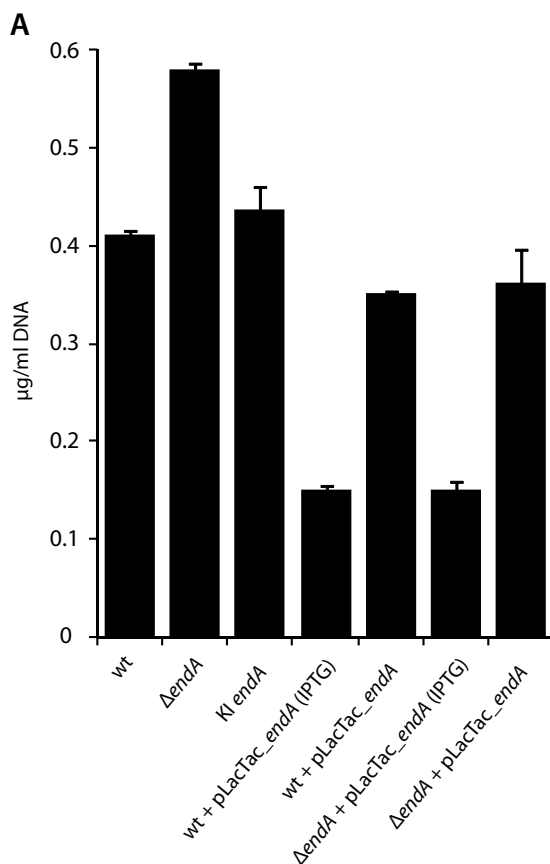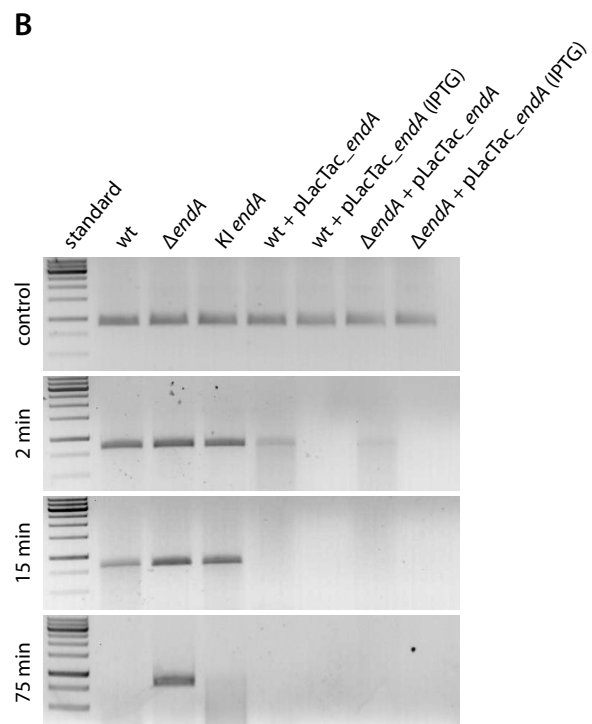

**Figure S2: Nuclease activity in supernatants of the complemented *endA* mutant and a strain overexpressing *endA*.** **A)** Amount of eDNA in cultures of the indicated strains grown in 4M medium for 24 hours. To induce overexpression of *endA* from pLactac-EndA, IPTG was added prior to inoculation (IPTG). **B)** Visualization of the degradation of a 1.2 kbp PCR fragment by supernatants of the indicated strains. Samples were taken prior addition of the supernatant (control) and at the indicated time points.

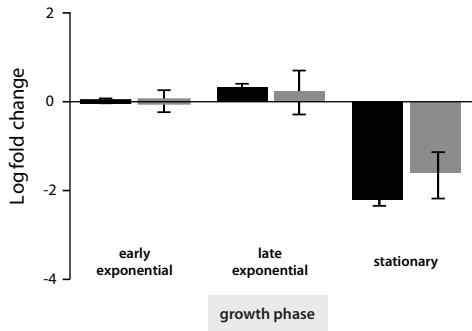

**Figure S3: Growth-dependent regulation of *phoA*.** The transcript levels of *phoA* compared to those of *endA* were determined by qRT-PCR. Displayed is the regulation of cells in the late exponential growth phase (OD<sub>600</sub> 2.0) and stationary growth phase (OD<sub>600</sub> 6.0) compared to the early exponential growth phase in LB medium (OD<sub>600</sub> 0.6).

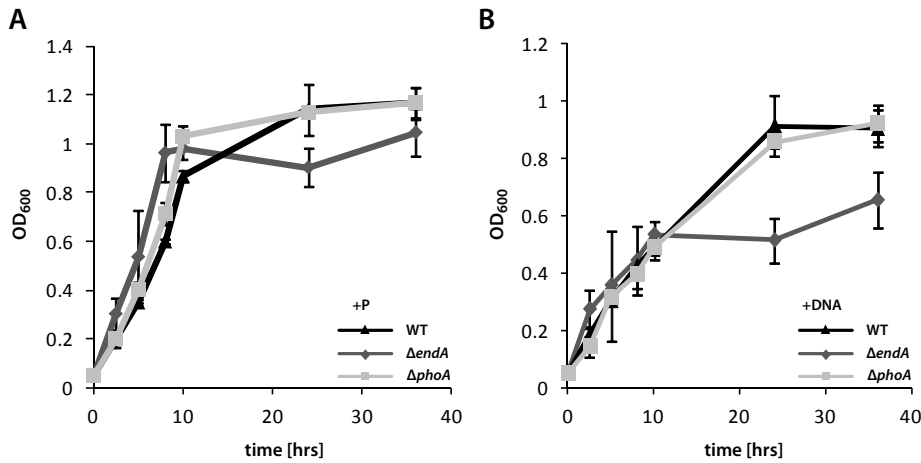

**Figure S4: Contribution of EndA and PhoA to aerobic growth during exponential growth phase.** Growth of the wild type (black triangles), the  $\Delta endA$  mutant (dark grey diamonds), and the  $\Delta phoA$  mutant (light grey squares) was followed for 36 hours in M1 mineral medium supplemented with either 0.86 mM NaH<sub>2</sub>PO<sub>4</sub> (A), or salmon sperm DNA (0.5 g · l<sup>-1</sup>; B). The error bars represent the standard deviation.

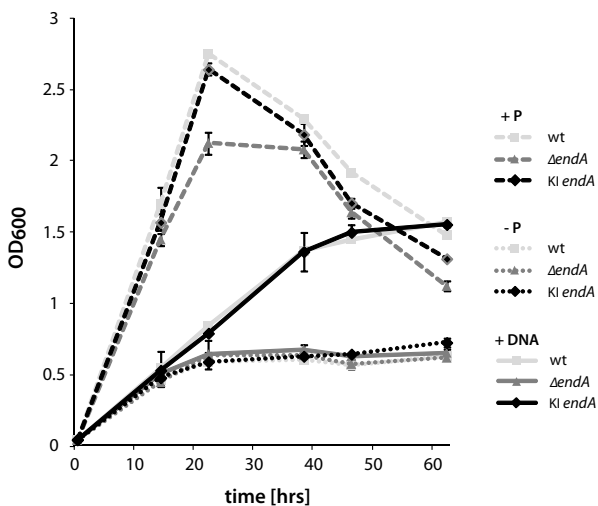

**Figure S5: Reintegration of *endA* into the corresponding deletion strain restores growth on eDNA as sole source of carbon.** Growth of the wild type (black squares), the  $\Delta endA$  mutant (grey triangles), and the complemented mutant (KI *endA*, black diamonds) was followed for 62 hours in M1 mineral medium supplemented with either 0.86 mM NaH<sub>2</sub>PO<sub>4</sub> (dashed lines), salmon sperm DNA (0.5 g · l<sup>-1</sup>; solid lines), or no source of phosphorus (dotted lines). The error bars represent the standard deviation.

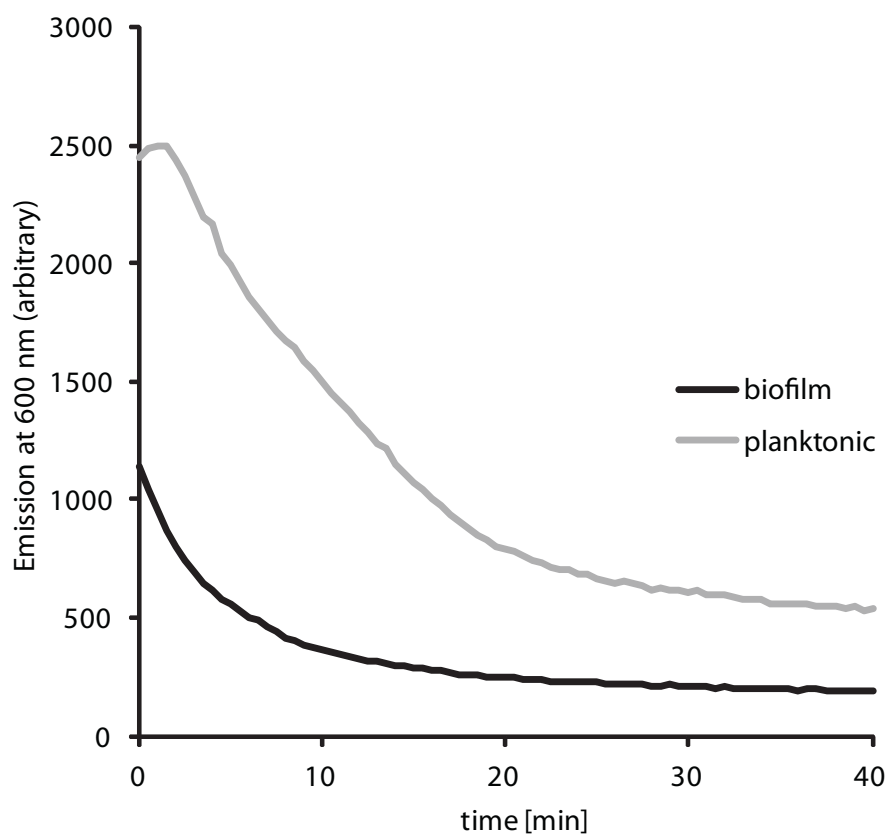

**Figure S6: Activity of MPB-EndA.** Activity of highly enriched MBP-EndA on eDNA in the supernatant of planktonic cultures (light grey) and on eDNA prepared from the matrix of statically grown biofilms. The activity was determined by the loss of fluorescence of DNA-bound GelRed™ nucleic acid stain due to DNA degradation.
